# Supplementary material for: Inter-System Variability of Eight Different Handheld Ultrasound (HHUS) Devices—A Prospective Comparison of B-Scan Quality and Clinical Significance in Intensive Care
Source: MDPI journal article supplement (doi:10.3390/diagnostics14010054), 2023-12-26
Supplement: s1 [file s1]

## Supplementary Material

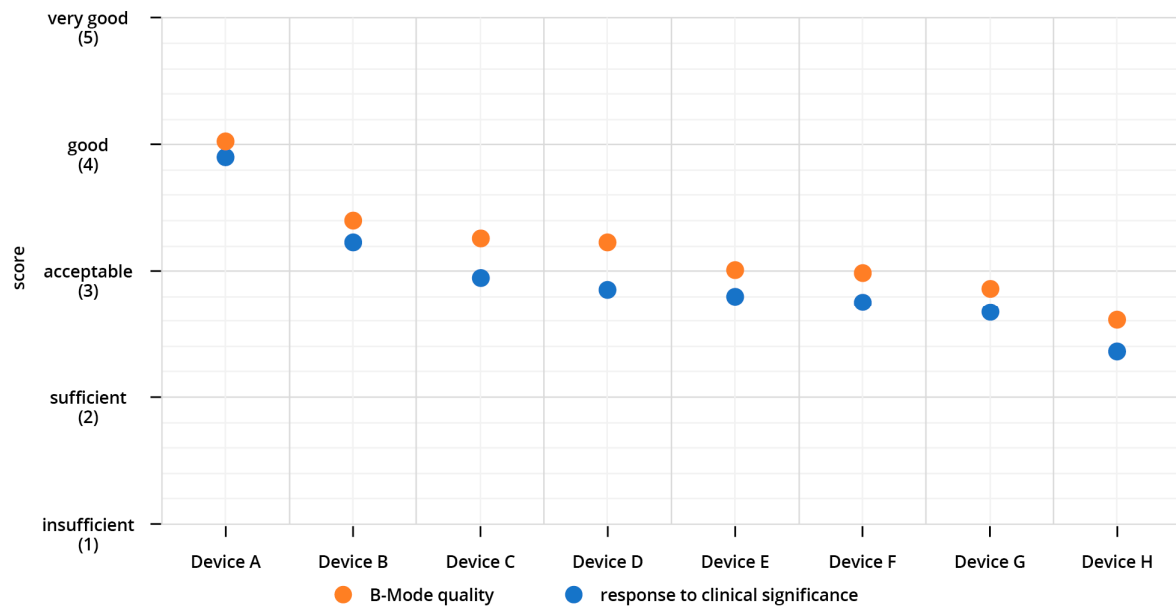

(a)

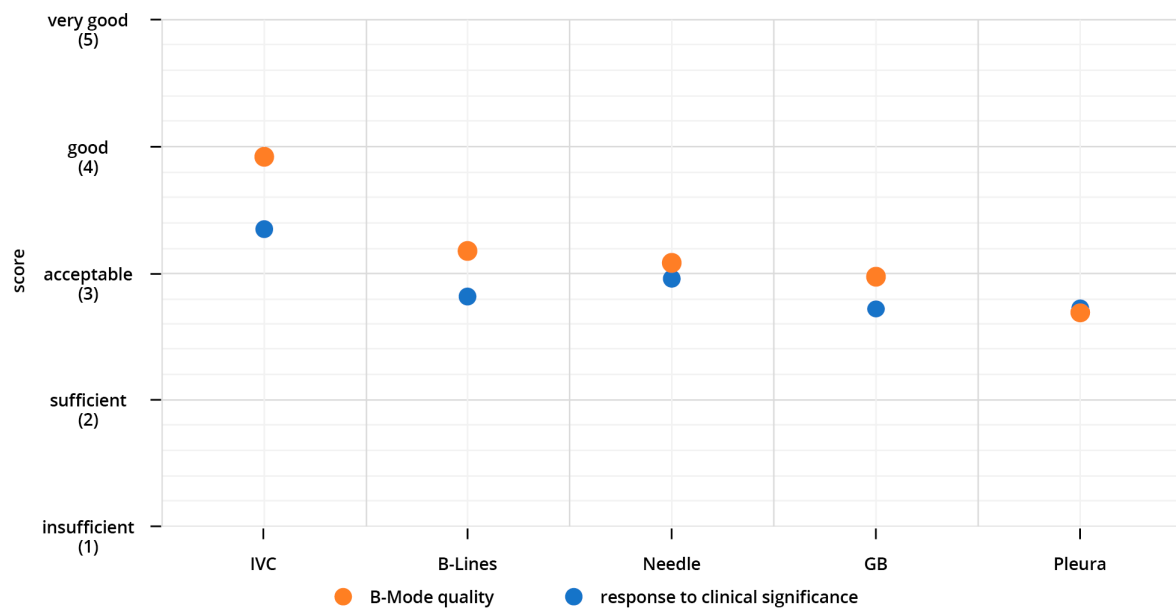

(b)

**Figure S1.** Comparison of the scores obtained from both evaluations for each device used (a) and for each sonographic question (b).

**Table S1.** Results of the evaluated B-scan quality per evaluator (a) and Results of the evaluated clinical significance per evaluator (b).

| <b>(a) B-Scan Quality</b>        |          |          |          |          |          |          |          |          |
|----------------------------------|----------|----------|----------|----------|----------|----------|----------|----------|
| EvaluatorNo.                     | Device A | Device B | Device C | Device D | Device E | Device F | Device G | Device H |
| 1                                | 4.2      | 3.4      | 3.2      | 2.6      | 3.2      | 3.6      | 3.4      | 3.0      |
| 2                                | 3.8      | 3.2      | 2.6      | 2.0      | 2.8      | 2.8      | 2.2      | 2.4      |
| 3                                | 4.0      | 3.0      | 3.0      | 3.2      | 2.8      | 3.0      | 3.0      | 2.4      |
| 4                                | 3.6      | 3.2      | 3.0      | 3.0      | 3.0      | 2.6      | 2.8      | 2.2      |
| 5                                | 3.8      | 3.4      | 3.4      | 2.8      | 2.4      | 2.8      | 2.4      | 2.2      |
| 6                                | 4.4      | 3.2      | 3.4      | 3.4      | 3.0      | 2.8      | 3.6      | 2.8      |
| 7                                | 3.8      | 3.0      | 3.2      | 3.0      | 2.6      | 3.2      | 2.8      | 2.8      |
| 8                                | 3.8      | 3.2      | 2.8      | 3.2      | 2.8      | 2.0      | 2.8      | 2.4      |
| 9                                | 3.4      | 3.0      | 3.2      | 2.6      | 2.8      | 3.0      | 1.8      | 2.4      |
| 10                               | 3.8      | 3.6      | 3.2      | 3.2      | 2.8      | 2.8      | 3.0      | 2.6      |
| 11                               | 4.2      | 3.8      | 3.0      | 3.0      | 2.8      | 3.2      | 2.8      | 2.6      |
| 12                               | 3.6      | 3.0      | 2.8      | 2.6      | 2.8      | 3.2      | 2.4      | 2.2      |
| 13                               | 3.6      | 2.0      | 2.4      | 2.2      | 2.4      | 2.0      | 2.2      | 1.8      |
| 14                               | 4.4      | 3.0      | 3.0      | 3.0      | 2.8      | 3.2      | 3.0      | 2.6      |
| 15                               | 3.6      | 2.2      | 2.4      | 2.2      | 2.0      | 2.0      | 2.0      | 1.8      |
| 16                               | 4.4      | 2.8      | 2.6      | 2.6      | 3.0      | 1.8      | 2.6      | 1.8      |
| <b>(b) Clinical Significance</b> |          |          |          |          |          |          |          |          |
| EvaluatorNo.                     | Device A | Device B | Device C | Device D | Device E | Device F | Device G | Device H |
| 1                                | 4.4      | 3.6      | 4.0      | 4.0      | 3.2      | 3.4      | 3.2      | 3.2      |
| 2                                | 3.6      | 3.4      | 2.4      | 2.2      | 3.0      | 2.6      | 2.4      | 2.0      |
| 3                                | 4.2      | 3.4      | 3.2      | 3.6      | 3.0      | 3.2      | 3.0      | 2.8      |
| 4                                | 3.8      | 3.8      | 3.0      | 3.2      | 3.2      | 3.2      | 3.0      | 2.8      |
| 5                                | 3.8      | 3.4      | 3.4      | 3.0      | 2.4      | 2.8      | 2.6      | 2.6      |
| 6                                | 4.8      | 3.6      | 3.8      | 2.6      | 3.6      | 2.4      | 3.6      | 2.6      |
| 7                                | 3.6      | 3.2      | 3.6      | 3.8      | 3.6      | 3.6      | 3.0      | 3.2      |
| 8                                | 4.0      | 3.8      | 3.0      | 3.8      | 2.8      | 3.2      | 3.4      | 2.6      |
| 9                                | 3.2      | 3.6      | 3.6      | 2.8      | 3.0      | 2.8      | 2.6      | 2.4      |
| 10                               | 3.4      | 3.6      | 3.2      | 3.4      | 2.8      | 2.8      | 3.2      | 2.4      |
| 11                               | 4.4      | 4.4      | 3.8      | 3.8      | 3.2      | 4.0      | 3.0      | 2.8      |
| 12                               | 3.8      | 3.0      | 3.0      | 2.8      | 2.8      | 3.2      | 2.2      | 2.2      |
| 13                               | 4.2      | 2.6      | 3.0      | 2.8      | 3.0      | 2.2      | 2.6      | 2.4      |
| 14                               | 4.8      | 3.2      | 3.4      | 3.4      | 3.4      | 3.6      | 2.8      | 3.2      |
| 15                               | 4.0      | 2.8      | 2.8      | 2.4      | 2.6      | 2.4      | 2.6      | 2.4      |
| 16                               | 4.4      | 3.0      | 3.0      | 3.0      | 2.6      | 2.4      | 2.6      | 2.2      |

**Table S2.** P-values in the comparison of the B-scan quality of the individual HHUS devices (a); P-values in the comparison of the clinical significance of the individual HHUS devices (b); p < 0.01 marked in red, p < 0.05 and > 0.01 marked in green.

| <b>p-value</b>                       |        |          |          |          |          |          |          |          |
|--------------------------------------|--------|----------|----------|----------|----------|----------|----------|----------|
| <b>B-scan Quality</b>                |        | Device A | Device B | Device C | Device D | Device E | Device F | Device G |
| Device B                             | <0.001 |          |          |          |          |          |          |          |
| Device C                             | <0.001 | 0.5      |          |          |          |          |          |          |
| Device D                             | <0.001 | 0.18     | 0.45     |          |          |          |          |          |
| Device E                             | <0.001 | 0.13     | 0.36     | 0.8      |          |          |          |          |
| Device F                             | <0.001 | 0.06     | 0.2      | 0.65     | 0.76     |          |          |          |
| Device G                             | <0.001 | 0.006    | 0.03     | 0.28     | 0.36     | 0.47     |          |          |
| Device H                             | <0.001 | <0.001   | <0.001   | 0.004    | 0.008    | 0.013    | 0.023    |          |
| <b>p-value Clinical Significance</b> |        | Device A | Device B | Device C | Device D | Device E | Device F | Device G |
| Device B                             | <0.001 |          |          |          |          |          |          |          |
| Device C                             | <0.001 | 0.55     |          |          |          |          |          |          |
| Device D                             | <0.001 | 0.46     | 0.88     |          |          |          |          |          |
| Device E                             | <0.001 | 0.07     | 0.22     | 0.31     |          |          |          |          |
| Device F                             | <0.001 | 0.045    | 0.16     | 0.24     | 0.87     |          |          |          |
| Device G                             | <0.001 | 0.001    | 0.008    | 0.03     | 0.24     | 0.32     |          |          |
| Device H                             | <0.001 | <0.001   | <0.001   | 0.002    | 0.03     | 0.04     | 0.15     |          |

**Table S3.** P-values in the comparison of the B-scan quality of the different sonographic questions (a); P-values in the comparison of the clinical significance of the different sonographic questions (b); p < 0.01 marked in red, p < 0.05 and > 0.01 marked in green.

| <b>p-value B-scan Quality</b>        |        |         |                |                 |
|--------------------------------------|--------|---------|----------------|-----------------|
|                                      | IVC    | B-Lines | Needletracking | Peural Effusion |
| B-Lines                              | 0.06   |         |                |                 |
| Needletracking                       | <0.001 | 0.28    |                |                 |
| Pleural Effusion                     | <0.001 | 0.038   | 0.35           |                 |
| Gallbladder                          | <0.001 | 0.05    | 0.43           | 0.98            |
| <b>p-value Clinical Significance</b> |        |         |                |                 |
|                                      | IVC    | B-Lines | Needletracking | Peural Effusion |
| B-Lines                              | <0.001 |         |                |                 |
| Needletracking                       | <0.001 | 0.63    |                |                 |
| Pleural Effusion                     | <0.001 | 0.17    | 0.42           |                 |
| Gallbladder                          | <0.001 | <0.001  | 0.009          | 0.039           |

**Table S4.** P-values (Anova analysis) in the comparison of the B-scan quality and the clinical significance of the different HHUS devices (marked in green:  $p < 0.05$ )

| <b>B-scan Quality</b>        | Device A | Device B | Device C | Device D | Device E | Device F | Device G |
|------------------------------|----------|----------|----------|----------|----------|----------|----------|
| <b>Clinical Significance</b> | Device A | Device B | Device C | Device D | Device E | Device F | Device G |
| <b>p-value</b>               | 0.12     | 0.02     | 0.03     | 0.03     | 0.17     | 0.10     | 0.23     |

**Table S5.** P-values (Anova analysis) in the comparison of the B-scan quality and the clinical significance of the different sonographic questions (marked in green:  $p < 0.05$ ; marked in red:  $p < 0.01$ )

| <b>B-scan Quality</b>        | IVC     | B-Lines | Needle Tracking | Pleural Effusion | Gallbladder |
|------------------------------|---------|---------|-----------------|------------------|-------------|
| <b>Clinical Significance</b> | IVC     | B-Lines | Needle Tracking | Pleural Effusion | Gallbladder |
| <b>p-value</b>               | < 0.001 | 0.12    | 0.07            | 0.012            | 0.83        |
